# Supplementary material for: Prostate-Derived Ets Factor (PDEF) Inhibits Metastasis by Inducing Epithelial/Luminal Phenotype in Prostate Cancer Cells
Source: Oxford University Press journal article supplement (doi:10.1158/1541-7786.mcr-18-0010), 2018-05-30
Supplement: 15417786mcr180010-sup-194921_3_supp_4729911_p840ll.xlsx [file 15417786mcr180010-sup-194921_3_supp_4729911_p840ll.xlsx]

## Sheet: mydata2
Symbol	Description	chromosome	map.location	Median expression when PDEF is LOW	Median expression when PDEF is HIGH	LOW-HIGH	Mann Whitney U test p value
HMGA2	high mobility group AT-hook 2	12	12q15	11.58	10.28	1.3	6.90644e-06
POU4F1	POU domain, class 4, transcription factor 1	13	13q31.1	9.81	8.54	1.27	0.00767084
LBX1	ladybird homeobox 1	10	10q24	10.49	9.34	1.15	9.17799e-06
GATA3	GATA binding protein 3	10	10p15	11.58	10.48	1.1	1.82008e-08
FOXE1	forkhead box E1 (thyroid transcription factor 2)	9	9q22	9.79	8.7	1.09	1.14438e-05
TWIST1	twist homolog 1 (acrocephalosyndactyly 3; Saethre-Chotzen syndrome) (Drosophila)	7	7p21.2	12.61	11.57	1.04	3.13167e-06
ASCL1	achaete-scute complex homolog 1 (Drosophila)	12	12q22-q23	9.91	8.93	0.98	0.0122402
PAX5	paired box gene 5 (B-cell lineage specific activator)	9	9p13	10.89	10.02	0.87	1.05679e-05
NEUROG1	neurogenin 1	5	5q23-q31	10.33	9.52	0.81	0.000765991
EGR3	early growth response 3	8	8p23-p21	11.05	10.25	0.8	0.000326519
SMAD5	SMAD family member 5	5	5q31	12.78	12.01	0.77	6.27155e-10
HIVEP2	human immunodeficiency virus type I enhancer binding protein 2	6	6q23-q24	10.63	9.9	0.73	0.00450661
HES1	hairy and enhancer of split 1, (Drosophila)	3	3q28-q29	12.55	11.83	0.72	5.0289e-10
LHX2	LIM homeobox 2	9	9q33-q34.1	9.08	8.36	0.72	0.165575
NPAS1	neuronal PAS domain protein 1	19	19q13.2-q13.3	9.61	8.89	0.72	0.0757322
SIX1	sine oculis homeobox homolog 1 (Drosophila)	14	14q23.1	12.47	11.76	0.71	1.93321e-05
SPIB	Spi-B transcription factor (Spi-1/PU.1 related)	19	19q13.3-q13.4	9.01	8.3	0.71	0.000326234
DLX2	distal-less homeobox 2	2	2q32	10.63	9.95	0.68	0.0173655
NR4A3	nuclear receptor subfamily 4, group A, member 3	9	9q22	10.53	9.87	0.66	0.0036405
HOXB6	homeobox B6	17	17q21.3	11.35	10.7	0.65	0.00216476
NR1I3	nuclear receptor subfamily 1, group I, member 3	1	1q23.3	9.11	8.46	0.65	0.0170572
HOXC4	homeobox C4	12	12q13.3	12.47	11.84	0.63	0.000297703
PAX2	paired box gene 2	10	10q24	10.55	9.93	0.62	0.166284
FOSB	FBJ murine osteosarcoma viral oncogene homolog B	19	19q13.32	11.62	11.01	0.61	0.00261193
PAX3	paired box gene 3 (Waardenburg syndrome 1)	2	2q35-q37 ; 2q35	8.77	8.16	0.61	0.00185366
CDX1	caudal type homeobox transcription factor 1	5	5q31-q33	9.16	8.56	0.6	0.000868309
ETS2	v-ets erythroblastosis virus E26 oncogene homolog 2 (avian)	21	21q22.3 ; 21q22.2	11.39	10.81	0.58	4.91227e-06
CEBPE	CCAAT/enhancer binding protein (C/EBP), epsilon	14	14q11.2	10.05	9.48	0.57	0.23901
MYEF2	myelin expression factor 2	15	15q21.1	10.48	9.91	0.57	0.000283066
AHR	aryl hydrocarbon receptor	7	7p15	12.06	11.5	0.56	2.02075e-06
ZIC1	Zic family member 1 (odd-paired homolog, Drosophila)	3	3q24	10.21	9.65	0.56	0.0137483
NFE2L2	nuclear factor (erythroid-derived 2)-like 2	2	2q31	12.36	11.8	0.56	3.25849e-09
ZNF22	zinc finger protein 22 (KOX 15)	10	10q11	12.68	12.13	0.55	1.75467e-07
EGR1	early growth response 1	5	5q31.1	12.44	11.9	0.54	0.00363981
CLOCK	clock homolog (mouse)	4	4q12	11.74	11.21	0.53	0.00264918
FOXI1	forkhead box I1	5	5q34	10.4	9.88	0.52	0.0782739
HOXD3	homeobox D3	2	2q31.1	10.81	10.3	0.51	0.00415153
TFDP2	transcription factor Dp-2 (E2F dimerization partner 2)	3	3q23	13.25	12.74	0.51	1.90169e-07
CEBPD	CCAAT/enhancer binding protein (C/EBP), delta	8	8p11.2-p11.1	13.26	12.76	0.5	6.05856e-14
RUNX3	runt-related transcription factor 3	1	1p36	10.87	10.37	0.5	0.00559273
EGR4	early growth response 4	2	2p13	9.48	8.99	0.49	0.0530052
KLF6	Kruppel-like factor 6	10	10p15	11.93	11.44	0.49	1.2653e-05
FOXJ1	forkhead box J1	17	17q22-q25	10.12	9.63	0.49	0.0047915
TERF1	telomeric repeat binding factor (NIMA-interacting) 1	8	8q13	8.73	8.25	0.48	0.0399083
ZIC2	Zic family member 2 (odd-paired homolog, Drosophila)	13	13q32	10.31	9.85	0.46	0.00509195
MECP2	methyl CpG binding protein 2 (Rett syndrome)	X	Xq28	10.72	10.27	0.45	0.182141
ZEB1	zinc finger E-box binding homeobox 1	10	10p11.2	11.28	10.83	0.45	0.00918002
ZNF43	zinc finger protein 43	19	19p13.1-p12	10.98	10.54	0.44	0.00677826
ARNTL2	aryl hydrocarbon receptor nuclear translocator-like 2	12	12p12.2-p11.2	9.05	8.62	0.43	0.158387
CDC5L	CDC5 cell division cycle 5-like (S. pombe)	6	6p21	12.72	12.29	0.43	1.28954e-08
IRF5	interferon regulatory factor 5	7	7q32	8.67	8.24	0.43	0.103959
MAFF	v-maf musculoaponeurotic fibrosarcoma oncogene homolog F (avian)	22	22q13.1	11.01	10.58	0.43	0.0107468
ERG	v-ets erythroblastosis virus E26 oncogene homolog (avian)	21	21q22.3	10.52	10.1	0.42	0.235556
ZNF35	zinc finger protein 35	3	3p22-p21	11.57	11.16	0.41	0.000187793
MSX1	msh homeobox 1	4	4p16.3-p16.1	10.44	10.04	0.4	0.12439
ID1	inhibitor of DNA binding 1, dominant negative helix-loop-helix protein	20	20q11	10.42	10.03	0.39	0.0338315
ATF6	activating transcription factor 6	1	1q22-q23	11.37	10.98	0.39	0.000273465
SMARCC2	SWI/SNF related, matrix associated, actin dependent regulator of chromatin, subfamily c, member 2	12	12q13-q14	11.97	11.59	0.38	0.0014733
SOX2	SRY (sex determining region Y)-box 2	3	3q26.3-q27	10.45	10.07	0.38	0.0271668
SUB1	SUB1 homolog (S. cerevisiae)	5	5p13.3	12.18	11.81	0.37	1.85922e-05
EGR2	early growth response 2 (Krox-20 homolog, Drosophila)	10	10q21.1	11.09	10.73	0.36	0.0384679
HOXB5	homeobox B5	17	17q21.3	10.07	9.71	0.36	0.00234483
LEF1	lymphoid enhancer-binding factor 1	4	4q23-q25	11.54	11.19	0.35	0.00286508
ZNF623	zinc finger protein 623	8	8q24.3	8.85	8.5	0.35	0.454015
ELF4	E74-like factor 4 (ets domain transcription factor)	X	Xq26	9.66	9.32	0.34	0.170315
PIAS1	protein inhibitor of activated STAT, 1	15	15q	12.82	12.48	0.34	0.00469275
TAL1	T-cell acute lymphocytic leukemia 1	1	1p32	8.91	8.57	0.34	0.628957
ID2	inhibitor of DNA binding 2, dominant negative helix-loop-helix protein	2	2p25	13.7	13.37	0.33	5.67943e-07
IRF2	interferon regulatory factor 2	4	4q34.1-q35.1	12	11.67	0.33	0.000916798
KLF10	Kruppel-like factor 10	8	8q22.2	12.71	12.38	0.33	1.09112e-07
MTF1	metal-regulatory transcription factor 1	1	1p33	8.96	8.63	0.33	0.998263
NFE2L3	nuclear factor (erythroid-derived 2)-like 3	7	7p15-p14	9.76	9.43	0.33	0.0959155
TSC22D1	TSC22 domain family, member 1	13	13q14	13.34	13.01	0.33	0.00094574
ZNF148	zinc finger protein 148	3	3q21	11.9	11.57	0.33	0.000172162
TCF7	transcription factor 7 (T-cell specific, HMG-box)	5	5q31.1	11.48	11.16	0.32	0.273615
ZNF211	zinc finger protein 211	19	19q13.4	11.07	10.75	0.32	0.0585763
JUNB	jun B proto-oncogene	19	19p13.2	11.97	11.66	0.31	0.266059
MYT1	myelin transcription factor 1	20	20q13.33	9.71	9.4	0.31	0.00485656
ZNF146	zinc finger protein 146	19	19q13.1	12.5	12.19	0.31	1.63601e-05
ETV5	ets variant gene 5 (ets-related molecule)	3	3q28	10.94	10.63	0.31	0.00651568
MEOX1	mesenchyme homeobox 1	17	17q21	10.11	9.8	0.31	0.450105
NR4A2	nuclear receptor subfamily 4, group A, member 2	2	2q22-q23	10.08	9.78	0.3	0.112096
STAT1	signal transducer and activator of transcription 1, 91kDa	2	2q32.2	12.17	11.87	0.3	0.00303236
RXRG	retinoid X receptor, gamma	1	1q22-q23	9.64	9.35	0.29	0.0847465
SP110	SP110 nuclear body protein	2	2q37.1	11.83	11.54	0.29	0.0116495
DLX5	distal-less homeobox 5	7	7q22	9.92	9.63	0.29	0.425686
HIF1A	hypoxia-inducible factor 1, alpha subunit (basic helix-loop-helix transcription factor)	14	14q21-q24	11.53	11.24	0.29	0.000938063
EPAS1	endothelial PAS domain protein 1	2	2p21-p16	11.21	10.93	0.28	0.000696302
POU3F1	POU domain, class 3, transcription factor 1	1	1p34.1	10.81	10.53	0.28	0.0300044
PPARG	peroxisome proliferator-activated receptor gamma	3	3p25	10.91	10.63	0.28	0.0197501
CDX2	caudal type homeobox transcription factor 2	13	13q12.3	9.88	9.61	0.27	0.0867307
POU2F2	POU domain, class 2, transcription factor 2	19	19q13.2	10.27	10	0.27	0.103514
TEAD4	TEA domain family member 4	12	12p13.2-p13.3	11.73	11.46	0.27	0.0244172
ZNF143	zinc finger protein 143	11	11p15.4	10.86	10.59	0.27	0.0522027
ZNF44	zinc finger protein 44	19	19p13.2	9.91	9.64	0.27	0.714629
ATF3	activating transcription factor 3	1	1q32.3	11.55	11.29	0.26	0.024556
NFKB1	nuclear factor of kappa light polypeptide gene enhancer in B-cells 1 (p105)	4	4q24	11.71	11.45	0.26	9.7714e-05
ID4	inhibitor of DNA binding 4, dominant negative helix-loop-helix protein	6	6p22-p21	12	11.74	0.26	0.301212
RORB	RAR-related orphan receptor B	9	9q22	11.98	11.72	0.26	0.215544
TFE3	transcription factor binding to IGHM enhancer 3	X	Xp11.22	11.95	11.69	0.26	9.68753e-05
ZNF174	zinc finger protein 174	16	16p13.3	11.49	11.23	0.26	0.0301651
BCLAF1	BCL2-associated transcription factor 1	6	6q22-q23	11.82	11.58	0.24	0.0516729
IRF1	interferon regulatory factor 1	5	5q31.1	10.77	10.53	0.24	0.0403381
RARG	retinoic acid receptor, gamma	12	12q13	9.32	9.08	0.24	0.301208
FOS	v-fos FBJ murine osteosarcoma viral oncogene homolog	14	14q24.3	12.61	12.38	0.23	0.163642
ATF4	activating transcription factor 4 (tax-responsive enhancer element B67)	22	22q13.1	11.71	11.49	0.22	0.0138237
CEBPZ	CCAAT/enhancer binding protein zeta	2	2p22.2	11.49	11.27	0.22	0.0287152
HOXD10	homeobox D10	2	2q31.1	9.9	9.68	0.22	0.051415
IRF3	interferon regulatory factor 3	19	19q13.3-q13.4	11.31	11.09	0.22	0.0851351
PBX1	pre-B-cell leukemia homeobox 1	1	1q23	11.47	11.25	0.22	0.386326
SPI1	spleen focus forming virus (SFFV) proviral integration oncogene spi1	11	11p11.2	12.4	12.18	0.22	0.314629
VDR	vitamin D (1,25- dihydroxyvitamin D3) receptor	12	12q13.11	8.59	8.37	0.22	0.440995
ZNF84	zinc finger protein 84	12	12q24.33	12.68	12.46	0.22	4.91695e-05
HOXC5	homeobox C5	12	12q13.3	10.41	10.2	0.21	0.790599
MAF	v-maf musculoaponeurotic fibrosarcoma oncogene homolog (avian)	16	16q22-q23	12.98	12.77	0.21	0.119654
EN2	engrailed homeobox 2	7	7q36	9.29	9.08	0.21	0.622794
CEBPG	CCAAT/enhancer binding protein (C/EBP), gamma	19	19q13.11	11.76	11.56	0.2	0.00435246
TFAP2A	transcription factor AP-2 alpha (activating enhancer binding protein 2 alpha)	6	6p24	12.18	11.98	0.2	0.342638
ZNF266	zinc finger protein 266	19	19p13.2	11.85	11.65	0.2	0.146575
FEV	FEV (ETS oncogene family)	2	2q36	10.42	10.23	0.19	0.368707
HOXD9	homeobox D9	2	2q31.1	10.2	10.01	0.19	0.367545
NFATC3	nuclear factor of activated T-cells, cytoplasmic, calcineurin-dependent 3	16	16q22.2	12.51	12.32	0.19	0.00305272
PRRX1	paired related homeobox 1	1	1q24	12.95	12.76	0.19	0.0980863
TBR1	T-box, brain, 1	2	2q24	9.17	8.98	0.19	0.622798
ETS1	v-ets erythroblastosis virus E26 oncogene homolog 1 (avian)	11	11q23.3	11.4	11.22	0.18	0.0180897
HOXB1	homeobox B1	17	17q21.3	8.64	8.46	0.18	0.572935
NPAS2	neuronal PAS domain protein 2	2	2q11.2	12.24	12.06	0.18	0.295127
TFAM	transcription factor A, mitochondrial	10	10q21	11.81	11.63	0.18	0.132563
ETV3	ets variant gene 3	1	1q21-q23	10.35	10.18	0.17	0.569994
HMGB3	high-mobility group box 3	X	Xq28	9.67	9.5	0.17	0.330605
MXD1	MAX dimerization protein 1	2	2p13-p12	11.59	11.42	0.17	0.0140818
RLF	rearranged L-myc fusion	1	1p32	10.98	10.81	0.17	0.0409782
PLAGL1	pleiomorphic adenoma gene-like 1	6	6q24-q25	11.33	11.17	0.16	0.721133
SALL4	sal-like 4 (Drosophila)	20	20q13.13-q13.2	10.27	10.11	0.16	0.0808894
ZNF141	zinc finger protein 141	4	4p16.3	10.86	10.7	0.16	0.0600412
ZNF45	zinc finger protein 45	19	19q13.2	9.09	8.93	0.16	0.76058
NKRF	NF-kappaB repressing factor	X	Xq24	10.12	9.96	0.16	0.413124
ARID5A	AT rich interactive domain 5A (MRF1-like)	2	2q11.2	9.1	8.95	0.15	0.861768
CREB5	cAMP responsive element binding protein 5	7	7p15.1	9.64	9.49	0.15	0.613595
HOXB7	homeobox B7	17	17q21.3	11.19	11.04	0.15	0.233841
MYBL2	v-myb myeloblastosis viral oncogene homolog (avian)-like 2	20	20q13.1	9.46	9.31	0.15	0.901266
NR1H4	nuclear receptor subfamily 1, group H, member 4	12	12q23.1	9.47	9.32	0.15	0.824311
TP53	tumor protein p53 (Li-Fraumeni syndrome)	17	17p13.1	9.14	8.99	0.15	0.875476
E2F4	E2F transcription factor 4, p107/p130-binding	16	16q21-q22	13.05	12.91	0.14	0.0276113
NFYB	nuclear transcription factor Y, beta	12	12q22-q23	12.46	12.32	0.14	0.477939
TFAP4	transcription factor AP-4 (activating enhancer binding protein 4)	16	16p13	11.67	11.53	0.14	0.564086
DMTF1	cyclin D binding myb-like transcription factor 1	7	7q21	12.75	12.62	0.13	0.00617796
FLI1	Friend leukemia virus integration 1	11	11q24.1-q24.3	8.94	8.81	0.13	0.0701631
MEF2A	myocyte enhancer factor 2A	15	15q26	12.03	11.9	0.13	0.111095
KLF1	Kruppel-like factor 1 (erythroid)	19	19p13.13-p13.12	9.56	9.44	0.12	0.444896
TGIF1	TGFB-induced factor homeobox 1	18	18p11.3	11.99	11.87	0.12	0.525069
RBPJ	recombination signal binding protein for immunoglobulin kappa J region	4	4p15.2	13.09	12.97	0.12	0.0176626
ST18	suppression of tumorigenicity 18 (breast carcinoma) (zinc finger protein)	8	8q11.23	10.42	10.3	0.12	0.613606
TEAD1	TEA domain family member 1 (SV40 transcriptional enhancer factor)	11	11p15.2	10.85	10.73	0.12	0.405726
EVX1	even-skipped homeobox 1	7	7p15-p14	9.24	9.13	0.11	0.0929119
RUNX2	runt-related transcription factor 2	6	6p21	10.79	10.68	0.11	0.873759
SP140	SP140 nuclear body protein	2	2q37.1	8.64	8.54	0.1	0.517979
MEF2C	myocyte enhancer factor 2C	5	5q14	11.67	11.57	0.1	0.024001
REL	v-rel reticuloendotheliosis viral oncogene homolog (avian)	2	2p13-p12	13.31	13.21	0.1	0.0162583
UBTF	upstream binding transcription factor, RNA polymerase I	17	17q21.3	12.54	12.44	0.1	0.272622
ZFX	zinc finger protein, X-linked	X	Xp21.3	11.67	11.57	0.1	0.353799
SRF	serum response factor (c-fos serum response element-binding transcription factor)	6	6p21.1	8.71	8.62	0.09	0.334931
ARNT	aryl hydrocarbon receptor nuclear translocator	1	1q21	11.39	11.3	0.09	0.314616
DPF2	D4, zinc and double PHD fingers family 2	11	11q13	11.02	10.93	0.09	0.700054
GLI1	glioma-associated oncogene homolog 1 (zinc finger protein)	12	12q13.2-q13.3	10.72	10.63	0.09	0.185728
NKX2-2	NK2 transcription factor related, locus 2 (Drosophila)	20	20pter-q11.23	8.73	8.64	0.09	0.168955
POU2F1	POU domain, class 2, transcription factor 1	1	1q22-q23	10.58	10.49	0.09	0.856641
RFX1	regulatory factor X, 1 (influences HLA class II expression)	19	19p13.1	12.67	12.58	0.09	0.842979
TFDP1	transcription factor Dp-1	13	13q34	13.23	13.14	0.09	0.0585513
ZNF3	zinc finger protein 3	7	7q22.1	12.67	12.58	0.09	0.391114
ZNF7	zinc finger protein 7	8	8q24	10.54	10.45	0.09	0.342649
ZNF85	zinc finger protein 85	19	19p13.1-p12	9.67	9.58	0.09	0.372196
ADNP	activity-dependent neuroprotector	20	20q13.13	12.05	11.97	0.08	0.166267
HMGB2	high-mobility group box 2	4	4q31	12.18	12.1	0.08	0.598397
PBX2	pre-B-cell leukemia homeobox 2	6	6p21.3	11.16	11.08	0.08	0.977427
BATF	basic leucine zipper transcription factor, ATF-like	14	14q24.3	8.89	8.82	0.07	0.851518
HLF	hepatic leukemia factor	17	17q22	9.72	9.65	0.07	0.482047
HOXA1	homeobox A1	7	7p15.3	9.48	9.41	0.07	0.587849
HOXA4	homeobox A4	7	7p15-p14	11.07	11	0.07	0.109177
MXI1	MAX interactor 1	10	10q24-q25	12.85	12.78	0.07	0.483346
STAT2	signal transducer and activator of transcription 2, 113kDa	12	12q13.2	12.23	12.16	0.07	0.127058
STAT3	signal transducer and activator of transcription 3 (acute-phase response factor)	17	17q21.31	10.71	10.64	0.07	0.421883
ZNF175	zinc finger protein 175	19	19q13.4	9.93	9.86	0.07	0.408195
HOXB2	homeobox B2	17	17q21-q22	10.04	9.97	0.07	0.192317
IRF8	interferon regulatory factor 8	16	16q24.1	12.28	12.21	0.07	0.826002
ZNF33B	zinc finger protein 33B	10	10q11.2	11.37	11.3	0.07	0.298166
GATA1	GATA binding protein 1 (globin transcription factor 1)	X	Xp11.23	9.8	9.74	0.06	0.209179
NR4A1	nuclear receptor subfamily 4, group A, member 1	12	12q13	12.38	12.32	0.06	0.469913
NFYA	nuclear transcription factor Y, alpha	6	6p21.3	12.45	12.39	0.06	0.354879
GLI2	GLI-Kruppel family member GLI2	2	2q14	9.71	9.66	0.05	0.244239
HIVEP1	human immunodeficiency virus type I enhancer binding protein 1	6	6p24-p22.3	12.48	12.43	0.05	0.345948
FOXD1	forkhead box D1	5	5q12-q13	9.51	9.46	0.05	0.880622
HMGN3	high mobility group nucleosomal binding domain 3	6	6q14.1	12.76	12.71	0.05	0.334875
NFAT5	nuclear factor of activated T-cells 5, tonicity-responsive	16	16q22.1	13.43	13.38	0.05	0.122232
ZNF652	zinc finger protein 652	17	17q21.32	13.36	13.31	0.05	0.56993
ESRRG	estrogen-related receptor gamma	1	1q41	10.4	10.36	0.04	0.435875
GLI3	GLI-Kruppel family member GLI3 (Greig cephalopolysyndactyly syndrome)	7	7p13	12.07	12.03	0.04	0.54224
RXRA	retinoid X receptor, alpha	9	9q34.3	12.8	12.76	0.04	0.77385
SMAD3	SMAD family member 3	15	15q22.33	10.05	10.01	0.04	0.676009
SMAD6	SMAD family member 6	15	15q21-q22	11.39	11.35	0.04	0.856642
SOX4	SRY (sex determining region Y)-box 4	6	6p22.3	10.74	10.7	0.04	0.958341
SREBF2	sterol regulatory element binding transcription factor 2	22	22q13	12.01	11.97	0.04	0.288156
TBP	TATA box binding protein	6	6q27	11.68	11.64	0.04	0.672842
GATA2	GATA binding protein 2	3	3q21.3	12.73	12.7	0.03	0.708129
TFAP2B	transcription factor AP-2 beta (activating enhancer binding protein 2 beta)	6	6p12	8.56	8.53	0.03	0.94274
ARID4A	AT rich interactive domain 4A (RBP1-like)	14	14q23.1	11.83	11.8	0.03	0.91334
ATF2	activating transcription factor 2	2	2q32	12.08	12.05	0.03	0.151458
E2F3	E2F transcription factor 3	6	6p22	11.04	11.01	0.03	0.22208
NFE2L1	nuclear factor (erythroid-derived 2)-like 1	17	17q21.3	13.26	13.23	0.03	0.690377
NR1D2	nuclear receptor subfamily 1, group D, member 2	3	3p24.2	12.66	12.63	0.03	0.693587
SMAD1	SMAD family member 1	4	4q31	10.59	10.56	0.03	0.703286
ETV4	ets variant gene 4 (E1A enhancer binding protein, E1AF)	17	17q21	8.38	8.36	0.02	0.798971
LZTR1	leucine-zipper-like transcription regulator 1	22	22q11.21 ; 22q11.1-q11.2	11.46	11.44	0.02	0.885778
FOSL2	FOS-like antigen 2	2	2p23.3	12.61	12.59	0.02	0.535041
NFIL3	nuclear factor, interleukin 3 regulated	9	9q22	13.37	13.35	0.02	0.608967
NRF1	nuclear respiratory factor 1	7	7q32	11.15	11.13	0.02	0.505387
SP100	SP100 nuclear antigen	2	2q37.1	12.73	12.71	0.02	0.245989
TCFL5	transcription factor-like 5 (basic helix-loop-helix)	20	20q13.3-qter	11.18	11.16	0.02	0.235525
BCL11B	B-cell CLL/lymphoma 11B (zinc finger protein)	14	14q32.2	8.88	8.87	0.01	0.787242
NR2C1	nuclear receptor subfamily 2, group C, member 1	12	12q22	11.71	11.7	0.01	0.402043
BAZ2B	bromodomain adjacent to zinc finger domain, 2B	2	2q23-q24	10.72	10.71	0.01	0.812467
CEBPB	CCAAT/enhancer binding protein (C/EBP), beta	20	20q13.1	10.15	10.14	0.01	0.245134
ID3	inhibitor of DNA binding 3, dominant negative helix-loop-helix protein	1	1p36.13-p36.12	8.34	8.33	0.01	0.249541
RORA	RAR-related orphan receptor A	15	15q21-q22	11.67	11.66	0.01	0.44879
ZHX2	zinc fingers and homeoboxes 2	8	8q24.13	11.52	11.51	0.01	0.947938
ETV1	ets variant gene 1	7	7p21.3	9.47	9.47	0	0.991317
MLLT10	myeloid/lymphoid or mixed-lineage leukemia (trithorax homolog, Drosophila); translocated to, 10	10	10p12	12.52	12.52	0	0.722753
NR3C1	nuclear receptor subfamily 3, group C, member 1 (glucocorticoid receptor)	5	5q31.3	11.39	11.39	0	0.653894
POU3F2	POU domain, class 3, transcription factor 2	6	6q16	8.6	8.6	0	0.495692
YBX1	Y box binding protein 1	1	1p34	13.86	13.86	0	0.798929
ZNF136	zinc finger protein 136	19	19p13.2-p13.12	11.98	11.98	0	0.672833
ZNF217	zinc finger protein 217	20	20q13.2	12.75	12.75	0	0.488795
CNBP	CCHC-type zinc finger, nucleic acid binding protein	3	3q21	13.4	13.41	-0.01	0.607392
ETV6	ets variant gene 6 (TEL oncogene)	12	12p13	12.35	12.36	-0.01	0.569957
HOXB3	homeobox B3	17	17q21.3	8.69	8.7	-0.01	0.615113
JUND	jun D proto-oncogene	19	19p13.2	14.31	14.32	-0.01	0.361401
PKNOX1	PBX/knotted 1 homeobox 1	21	21q22.3	11.78	11.79	-0.01	0.970484
WT1	Wilms tumor 1	11	11p13	9.21	9.22	-0.01	0.552386
ZBTB20	zinc finger and BTB domain containing 20	3	3q13.2	12.56	12.57	-0.01	0.782207
NR2C2	nuclear receptor subfamily 2, group C, member 2	3	3p25	12.12	12.13	-0.01	0.683983
ZNF197	zinc finger protein 197	3	3p21	12.29	12.3	-0.01	0.35722
ZNF410	zinc finger protein 410	14	14q24.3	11.89	11.91	-0.02	0.706491
TCF12	transcription factor 12 (HTF4, helix-loop-helix transcription factors 4)	15	15q21	12.11	12.13	-0.02	0.706504
AFF2	AF4/FMR2 family, member 2	X	Xq28	9.13	9.16	-0.03	0.464578
FOXK2	forkhead box K2	17	17q25	12.21	12.24	-0.03	0.307304
PEG3	paternally expressed 3	19	19q13.4	8.38	8.41	-0.03	0.946201
PITX1	paired-like homeodomain transcription factor 1	5	5q31	8.33	8.36	-0.03	0.556707
PPARA	peroxisome proliferator-activated receptor alpha	22	22q12-q13.1 ; 22q13.31	11.34	11.37	-0.03	0.802347
ZNF536	zinc finger protein 536	19	19q12	8.96	8.99	-0.03	0.0529919
CREBL2	cAMP responsive element binding protein-like 2	12	12p13	12.54	12.57	-0.03	0.142941
POU4F2	POU domain, class 4, transcription factor 2	4	4q31.2	8.11	8.14	-0.03	0.467113
ZNF345	zinc finger protein 345	19	19q13.12	10.2	10.23	-0.03	0.471262
INSM1	insulinoma-associated 1	20	20p11.2	9.75	9.79	-0.04	0.526475
NFE2	nuclear factor (erythroid-derived 2), 45kDa	12	12q13	8.46	8.5	-0.04	0.734165
TUB	tubby homolog (mouse)	11	11p15.5	10.9	10.94	-0.04	0.245119
PAX6	paired box gene 6 (aniridia, keratitis)	11	11p13	8.87	8.91	-0.04	0.690409
RCOR1	REST corepressor 1	14	14q32.31-q32.32	12.68	12.72	-0.04	0.827693
SOX5	SRY (sex determining region Y)-box 5	12	12p12.1	9.42	9.46	-0.04	0.231284
IRF4	interferon regulatory factor 4	6	6p25-p23	9.06	9.11	-0.05	0.863479
MITF	microphthalmia-associated transcription factor	3	3p14.2-p14.1	10.46	10.51	-0.05	0.829396
PHOX2B	paired-like homeobox 2b	4	4p12	8.39	8.44	-0.05	0.416782
AFF1	AF4/FMR2 family, member 1	4	4q21	12.42	12.47	-0.05	0.326269
E2F5	E2F transcription factor 5, p130-binding	8	8q21.2	12.36	12.41	-0.05	0.868608
HOXD4	homeobox D4	2	2q31.1	9.91	9.96	-0.05	0.672854
HOXA9	homeobox A9	7	7p15-p14	13.14	13.2	-0.06	0.365204
NR1H3	nuclear receptor subfamily 1, group H, member 3	11	11p11.2	10.55	10.61	-0.06	0.749009
PAX8	paired box gene 8	2	2q12-q14	8.38	8.44	-0.06	0.182699
ZBTB17	zinc finger and BTB domain containing 17	1	1p36.2-p36.1	9.47	9.53	-0.06	0.553841
ERF	Ets2 repressor factor	19	19q13	12.61	12.67	-0.06	0.921974
FOXM1	forkhead box M1	12	12p13	9.65	9.71	-0.06	0.182146
MLLT1	myeloid/lymphoid or mixed-lineage leukemia (trithorax homolog, Drosophila); translocated to, 1	19	19p13.3	13	13.06	-0.06	0.0823608
NCOR2	nuclear receptor co-repressor 2	12	12q24	11.49	11.55	-0.06	0.23986
NR0B1	nuclear receptor subfamily 0, group B, member 1	X	Xp21.3-p21.2	8.37	8.43	-0.06	0.43582
ZNF467	zinc finger protein 467	7	7q36.1	10.25	10.31	-0.06	0.650749
CBFB	core-binding factor, beta subunit	16	16q22.1	12.4	12.47	-0.07	0.321996
KLF5	Kruppel-like factor 5 (intestinal)	13	13q22.1	12.52	12.59	-0.07	0.693618
MTA2	metastasis associated 1 family, member 2	11	11q12-q13.1	13.24	13.31	-0.07	0.086286
NFRKB	nuclear factor related to kappaB binding protein	11	11q24-q25	11.33	11.4	-0.07	0.472599
NKX3-1	NK3 transcription factor related, locus 1 (Drosophila)	8	8p21	13.41	13.48	-0.07	0.00227147
RXRB	retinoid X receptor, beta	6	6p21.3	10.92	10.99	-0.07	0.652323
ZKSCAN3	zinc finger with KRAB and SCAN domains 3	6	6p22.1	10.59	10.66	-0.07	0.411906
ZNF423	zinc finger protein 423	16	16q12	10.9	10.97	-0.07	0.953138
ZNF239	zinc finger protein 239	10	10q11.22-q11.23	10.96	11.04	-0.08	0.403273
FOXF1	forkhead box F1	16	16q24	10.7	10.78	-0.08	0.326295
MEIS2	Meis homeobox 2	15	15q14	12.31	12.39	-0.08	0.473942
NHLH2	nescient helix loop helix 2	1	1p12-p11	8.35	8.43	-0.08	0.0413903
SIM2	single-minded homolog 2 (Drosophila)	21	21q22.2 ; 21q22.13	13.77	13.85	-0.08	0.380384
SMARCE1	SWI/SNF related, matrix associated, actin dependent regulator of chromatin, subfamily e, member 1	17	17q21.2	12.69	12.77	-0.08	0.108657
SOX11	SRY (sex determining region Y)-box 11	2	2p25	9.6	9.68	-0.08	0.0851121
SP4	Sp4 transcription factor	7	7p15.3	11.15	11.23	-0.08	0.540796
STAT5B	signal transducer and activator of transcription 5B	17	17q11.2	10.88	10.96	-0.08	0.420624
VEZF1	vascular endothelial zinc finger 1	17	17q22	12.41	12.49	-0.08	0.010395
CREB1	cAMP responsive element binding protein 1	2	2q34	11.9	11.99	-0.09	0.233814
FOXA1	forkhead box A1	14	14q12-q13	13.63	13.72	-0.09	0.00178596
MLXIP	MLX interacting protein	12	12q24.31	12.07	12.16	-0.09	0.724389
SMAD7	SMAD family member 7	18	18q21.1	11.32	11.41	-0.09	0.285209
SNAI2	snail homolog 2 (Drosophila)	8	8q11	11.56	11.65	-0.09	0.562626
ZNF124	zinc finger protein 124	1	1q44	11.28	11.37	-0.09	0.56848
IRX4	iroquois homeobox protein 4	5	5p15.3	10.79	10.88	-0.09	0.613601
ELF3	E74-like factor 3 (ets domain transcription factor, epithelial-specific )	1	1q32.2	9.01	9.11	-0.1	0.336031
GTF2I	general transcription factor II, i	7	7q11.23	13.24	13.34	-0.1	0.00963897
JUN	jun oncogene	1	1p32-p31	9.48	9.58	-0.1	0.060032
NFIC	nuclear factor I/C (CCAAT-binding transcription factor)	19	19p13.3	12.91	13.01	-0.1	0.000820022
NRL	neural retina leucine zipper	14	14q11.1-q11.2	9.32	9.42	-0.1	0.205239
ZNF117	zinc finger protein 117	7	7q11.21	9.19	9.29	-0.1	0.695225
DBP	D site of albumin promoter (albumin D-box) binding protein	19	19q13.3	10.78	10.88	-0.1	0.432037
MEIS1	Meis homeobox 1	2	2p14-p13	9.61	9.71	-0.1	0.0233311
AR	androgen receptor (dihydrotestosterone receptor; testicular feminization; spinal and bulbar muscular atrophy; Kennedy disease)	X	Xq11.2-q12	13.57	13.68	-0.11	0.00014666
PARP1	poly (ADP-ribose) polymerase family, member 1	1	1q41-q42	12.76	12.87	-0.11	0.00224184
RARB	retinoic acid receptor, beta	3	3p24	9.18	9.29	-0.11	0.119128
TFAP2C	transcription factor AP-2 gamma (activating enhancer binding protein 2 gamma)	20	20q13.2	11.4	11.51	-0.11	0.240724
ZFP36L2	zinc finger protein 36, C3H type-like 2	2	2p22.3-p21	13.31	13.42	-0.11	0.00501956
ZNF157	zinc finger protein 157	X	Xp11.2	8.5	8.61	-0.11	0.00211501
HSF1	heat shock transcription factor 1	8	8q24.3	11.95	12.06	-0.11	0.0157831
SMAD2	SMAD family member 2	18	18q21.1	12.85	12.96	-0.11	0.00258849
TERF2	telomeric repeat binding factor 2	16	16q22.1	11.11	11.22	-0.11	0.778882
TTF1	transcription termination factor, RNA polymerase I	9	9q34.13	11.62	11.73	-0.11	0.679213
BCL6	B-cell CLL/lymphoma 6 (zinc finger protein 51)	3	3q27	10.56	10.68	-0.12	0.953139
MTA1	metastasis associated 1	14	14q32.3	12.9	13.02	-0.12	0.00866101
PURA	purine-rich element binding protein A	5	5q31	13.65	13.77	-0.12	0.00562749
RREB1	ras responsive element binding protein 1	6	6p25	12.42	12.54	-0.12	0.034745
XBP1	X-box binding protein 1	22	22q12.1 ; 22q12	12.68	12.8	-0.12	0.0924637
KLF3	Kruppel-like factor 3 (basic)	4	4p14	12.07	12.2	-0.13	0.272624
MYOG	myogenin (myogenic factor 4)	1	1q31-q41	10.32	10.45	-0.13	0.916796
PRDM2	PR domain containing 2, with ZNF domain	1	1p36.21	12.49	12.62	-0.13	0.014947
ZNF274	zinc finger protein 274	19	19qter	10.31	10.44	-0.13	0.567036
ESR2	estrogen receptor 2 (ER beta)	14	14q23.2	9.08	9.21	-0.13	0.209156
LITAF	lipopolysaccharide-induced TNF factor	16	16p13.13	13.44	13.57	-0.13	0.000162708
NEUROD2	neurogenic differentiation 2	17	17q12	9.08	9.21	-0.13	0.252267
NFIB	nuclear factor I/B	9	9p24.1	11.85	11.98	-0.13	0.167613
NR5A1	nuclear receptor subfamily 5, group A, member 1	9	9q33	9.5	9.63	-0.13	0.414384
OLIG2	oligodendrocyte lineage transcription factor 2	21	21q22.11	8.33	8.46	-0.13	0.0420382
PROX1	prospero-related homeobox 1	1	1q32.2-q32.3	9.68	9.81	-0.13	0.292111
SATB1	SATB homeobox 1	3	3p23	11.48	11.62	-0.14	0.147787
ZNF787	zinc finger protein 787	19	19q13.42	9.15	9.29	-0.14	0.0138276
FOXO3	forkhead box O3	6	6q21	11.61	11.75	-0.14	0.0750091
FOXO4	forkhead box O4	X	Xq13.1	9.49	9.63	-0.14	0.0514183
IKZF1	IKAROS family zinc finger 1 (Ikaros)	7	7p13-p11.1	9.95	10.09	-0.14	0.979163
MSX2	msh homeobox 2	5	5q34-q35	9.33	9.47	-0.14	0.409419
SRY	sex determining region Y	Y	Yp11.3	9.18	9.32	-0.14	0.0668465
THRB	thyroid hormone receptor, beta (erythroblastic leukemia viral (v-erb-a) oncogene homolog 2, avian)	3	3p24.2	10.6	10.74	-0.14	0.247797
ZNF140	zinc finger protein 140	12	12q24.32-q24.33	9.27	9.41	-0.14	0.123841
ISL1	ISL1 transcription factor, LIM/homeodomain, (islet-1)	5	5q11.2	11.71	11.86	-0.15	0.956607
PPARD	peroxisome proliferator-activated receptor delta	6	6p21.2-p21.1	11.97	12.12	-0.15	0.00617851
SETDB1	SET domain, bifurcated 1	1	1q21	12.38	12.53	-0.15	0.0028422
ATF7	activating transcription factor 7	12	12q13	11.36	11.51	-0.15	0.0334668
ELF2	E74-like factor 2 (ets domain transcription factor)	4	4q28	12.1	12.25	-0.15	0.0718488
MAFB	v-maf musculoaponeurotic fibrosarcoma oncogene homolog B (avian)	20	20q11.2-q13.1	10.58	10.73	-0.15	0.0643135
NR0B2	nuclear receptor subfamily 0, group B, member 2	1	1p36.1	9.49	9.64	-0.15	0.096329
STAT5A	signal transducer and activator of transcription 5A	17	17q11.2	8.69	8.85	-0.16	0.0309978
TLX1	T-cell leukemia homeobox 1	10	10q24	8.4	8.56	-0.16	0.0527101
JARID2	jumonji, AT rich interactive domain 2	6	6p24-p23	12.18	12.35	-0.17	0.0338279
NFIX	nuclear factor I/X (CCAAT-binding transcription factor)	19	19p13.3	13.52	13.69	-0.17	6.12665e-07
NKX2-5	NK2 transcription factor related, locus 5 (Drosophila)	5	5q34	8.98	9.15	-0.17	0.0139086
PIAS3	protein inhibitor of activated STAT, 3	1	1q21	11.13	11.3	-0.17	0.118618
SHOX2	short stature homeobox 2	3	3q25-q26.1	8.75	8.92	-0.17	0.0812291
SOX3	SRY (sex determining region Y)-box 3	X	Xq27.1	8.41	8.58	-0.17	0.147162
ZKSCAN1	zinc finger with KRAB and SCAN domains 1	7	7q21.3-q22.1	12.64	12.81	-0.17	0.00849364
GFI1	growth factor independent 1	1	1p22	8.49	8.67	-0.18	0.110107
IRX5	iroquois homeobox protein 5	16	16q11.2-q13	9.61	9.79	-0.18	0.283269
SSRP1	structure specific recognition protein 1	11	11q12	13.13	13.31	-0.18	0.000601936
HHEX	hematopoietically expressed homeobox	10	10q23.33	9.87	10.05	-0.18	0.0916385
ARID1A	AT rich interactive domain 1A (SWI-like)	1	1p35.3	13.05	13.24	-0.19	4.26744e-07
CSDC2	cold shock domain containing C2, RNA binding	22	22q13.2-q13.31	10.24	10.43	-0.19	0.0782775
FOXN3	forkhead box N3	14	14q31.3	11.85	12.04	-0.19	0.00290447
GATA6	GATA binding protein 6	18	18q11.1-q11.2	10.34	10.53	-0.19	0.102595
NFATC1	nuclear factor of activated T-cells, cytoplasmic, calcineurin-dependent 1	18	18q23	10.18	10.37	-0.19	0.0835714
SMARCC1	SWI/SNF related, matrix associated, actin dependent regulator of chromatin, subfamily c, member 1	3	3p23-p21	12.5	12.69	-0.19	0.000602518
ARNTL	aryl hydrocarbon receptor nuclear translocator-like	11	11p15	9.2	9.39	-0.19	0.0665295
ZBTB48	zinc finger and BTB domain containing 48	1	1p36.3	10.45	10.64	-0.19	0.0205673
ESR1	estrogen receptor 1	6	6q25.1	9.42	9.62	-0.2	0.42065
RERE	arginine-glutamic acid dipeptide (RE) repeats	1	1p36.2-p36.1	11.46	11.66	-0.2	0.0887484
SP1	Sp1 transcription factor	12	12q13.1	12.56	12.76	-0.2	3.27606e-05
TULP1	tubby like protein 1	6	6p21.3	8.65	8.85	-0.2	0.160994
ZNF132	zinc finger protein 132	19	19q13.4	10.57	10.77	-0.2	0.596883
FOXF2	forkhead box F2	6	6p25.3	10.04	10.24	-0.2	0.0887572
TBX2	T-box 2	17	17q23	10.93	11.13	-0.2	0.94794
ZNF711	zinc finger protein 711	X	Xq21.1-q21.2	9.36	9.56	-0.2	0.96528
ZNF91	zinc finger protein 91	19	19p13.1-p12	12.68	12.88	-0.2	0.0112189
HSF4	heat shock transcription factor 4	16	16q21	8.58	8.79	-0.21	0.00462988
ZNF267	zinc finger protein 267	16	16p11.2	8.79	9	-0.21	0.532189
IRF7	interferon regulatory factor 7	11	11p15.5	11.14	11.36	-0.22	0.141205
ZBED1	zinc finger, BED-type containing 1	X ; Y	Xp22.33 ; Yp11	10.21	10.43	-0.22	0.0323977
KLF9	Kruppel-like factor 9	9	9q13	10.75	10.97	-0.22	0.543693
POU3F4	POU domain, class 3, transcription factor 4	X	Xq21.1	8.83	9.05	-0.22	0.00201097
RELB	v-rel reticuloendotheliosis viral oncogene homolog B, nuclear factor of kappa light polypeptide gene enhancer in B-cells 3 (avian)	19	19q13.32	10.84	11.06	-0.22	0.519428
THRA	thyroid hormone receptor, alpha (erythroblastic leukemia viral (v-erb-a) oncogene homolog, avian)	17	17q11.2	10.76	10.98	-0.22	0.0011647
RFX5	regulatory factor X, 5 (influences HLA class II expression)	1	1q21	11.55	11.78	-0.23	9.26261e-05
CIZ1	CDKN1A interacting zinc finger protein 1	9	9q34.1	11.09	11.32	-0.23	0.0189632
HMGA1	high mobility group AT-hook 1	6	6p21	12	12.23	-0.23	0.00325351
MYCN	v-myc myelocytomatosis viral related oncogene, neuroblastoma derived (avian)	2	2p24.1	10.98	11.21	-0.23	0.68401
TCF7L2	transcription factor 7-like 2 (T-cell specific, HMG-box)	10	10q25.3	10.49	10.72	-0.23	0.110146
ZNF165	zinc finger protein 165	6	6p21.3	10.87	11.1	-0.23	0.928895
MAX	MYC associated factor X	14	14q23	11.89	12.13	-0.24	5.29905e-05
NR3C2	nuclear receptor subfamily 3, group C, member 2	4	4q31.1	11.09	11.33	-0.24	0.0264168
POU2F3	POU domain, class 2, transcription factor 3	11	11q23.3	8.95	9.19	-0.24	6.61211e-05
FOXO1	forkhead box O1	13	13q14.1	11.41	11.66	-0.25	0.0082317
FUBP1	far upstream element (FUSE) binding protein 1	1	1p31.1	12.82	13.07	-0.25	2.95306e-05
KLF4	Kruppel-like factor 4 (gut)	9	9q31	11.5	11.75	-0.25	0.161669
LYL1	lymphoblastic leukemia derived sequence 1	19	19p13.2	10.4	10.65	-0.25	0.00609855
NFYC	nuclear transcription factor Y, gamma	1	1p32	10.06	10.31	-0.25	0.000189363
RELA	v-rel reticuloendotheliosis viral oncogene homolog A, nuclear factor of kappa light polypeptide gene enhancer in B-cells 3, p65 (avian)	11	11q13	13.3	13.56	-0.26	0.000372502
SOX9	SRY (sex determining region Y)-box 9 (campomelic dysplasia, autosomal sex-reversal)	17	17q24.3-q25.1	12.25	12.51	-0.26	0.0392838
TCF4	transcription factor 4	18	18q21.1	11.33	11.59	-0.26	0.0343784
HMG20B	high-mobility group 20B	19	19p13.3	12.77	13.04	-0.27	1.58956e-06
HNF4A	hepatocyte nuclear factor 4, alpha	20	20q12-q13.1	8.99	9.26	-0.27	0.000307658
TP73	tumor protein p73	1	1p36.3	9.6	9.87	-0.27	0.461938
ZNF142	zinc finger protein 142	2	2q34-q35	11.15	11.42	-0.27	0.0313502
DLX4	distal-less homeobox 4	17	17q21.33	8.91	9.19	-0.28	0.234688
E2F1	E2F transcription factor 1	20	20q11.2	9.3	9.59	-0.29	0.258634
MAZ	MYC-associated zinc finger protein (purine-binding transcription factor)	16	16p11.2	13.37	13.66	-0.29	2.78622e-10
MZF1	myeloid zinc finger 1	19	19q13.2-q13.4	9.82	10.12	-0.3	0.00288562
NR1H2	nuclear receptor subfamily 1, group H, member 2	19	19q13.3-q13.3	11.69	11.99	-0.3	0.00622008
CTCF	CCCTC-binding factor (zinc finger protein)	16	16q21-q22.3	10.73	11.04	-0.31	0.00241296
ZFP36L1	zinc finger protein 36, C3H type-like 1	14	14q22-q24	11.97	12.28	-0.31	0.00872318
MYOD1	myogenic differentiation 1	11	11p15.4	8.87	9.18	-0.31	0.00284376
TFCP2	transcription factor CP2	12	12q13	10.37	10.68	-0.31	0.0471441
HIC1	hypermethylated in cancer 1	17	17p13.3	10.5	10.82	-0.32	0.247796
HOXB13	homeobox B13	17	17q21.2	12.65	12.97	-0.32	1.3019e-07
NFATC4	nuclear factor of activated T-cells, cytoplasmic, calcineurin-dependent 4	14	14q11.2	9.89	10.21	-0.32	0.505405
ZNF76	zinc finger protein 76 (expressed in testis)	6	6p21.3-p21.2	10.43	10.75	-0.32	0.258645
HMX1	homeobox (H6 family) 1	4	4p16.1	8.67	9	-0.33	3.50829e-05
POU1F1	POU domain, class 1, transcription factor 1 (Pit1, growth hormone factor 1)	3	3p11	9.18	9.51	-0.33	0.0116512
RARA	retinoic acid receptor, alpha	17	17q21	9.33	9.66	-0.33	0.0867315
ELK1	ELK1, member of ETS oncogene family	X	Xp11.2	11.38	11.72	-0.34	0.000181353
PITX2	paired-like homeodomain transcription factor 2	4	4q25-q27	9.4	9.74	-0.34	0.306327
TBX5	T-box 5	12	12q24.1	10.43	10.77	-0.34	0.176502
USF2	upstream transcription factor 2, c-fos interacting	19	19q13	11.16	11.5	-0.34	1.79239e-06
ELK4	ELK4, ETS-domain protein (SRF accessory protein 1)	1	1q32	11.98	12.33	-0.35	0.00548372
FOXJ3	forkhead box J3	1	1pter-q31.3	12.01	12.36	-0.35	0.000124331
POU6F1	POU domain, class 6, transcription factor 1	12	12q13.13	10.01	10.36	-0.35	0.0157858
TCF15	transcription factor 15 (basic helix-loop-helix)	20	20p13	10.39	10.74	-0.35	0.405734
TCF21	transcription factor 21	6	6pter-qter	10.49	10.84	-0.35	0.0202159
ZNF135	zinc finger protein 135	19	19q13.4	9.58	9.94	-0.36	0.00610043
FOXC1	forkhead box C1	6	6p25	10.64	11.01	-0.37	0.0698271
TGIF2	TGFB-induced factor homeobox 2	20	20q11.2-q12	9.98	10.36	-0.38	0.163613
NFKB2	nuclear factor of kappa light polypeptide gene enhancer in B-cells 2 (p49/p100)	10	10q24	11.78	12.16	-0.38	0.000436052
PDX1	pancreatic and duodenal homeobox 1	13	13q12.1	8.72	9.11	-0.39	0.000718192
HSF2	heat shock transcription factor 2	6	6q22.31	9.93	10.32	-0.39	0.00104595
MYF6	myogenic factor 6 (herculin)	12	12q21	8.59	8.98	-0.39	0.0161696
STAT4	signal transducer and activator of transcription 4	2	2q32.2-q32.3	11.17	11.56	-0.39	0.915071
BCL11A	B-cell CLL/lymphoma 11A (zinc finger protein)	2	2p16.1	8.4	8.8	-0.4	0.0937365
TSC22D3	TSC22 domain family, member 3	X	Xq22.3	12.2	12.6	-0.4	0.000707361
PLAGL2	pleiomorphic adenoma gene-like 2	20	20q11.21	10.39	10.81	-0.42	0.00965644
MBD3	methyl-CpG binding domain protein 3	19	19p13.3	12.1	12.53	-0.43	1.79202e-08
NR5A2	nuclear receptor subfamily 5, group A, member 2	1	1q32.1	10	10.43	-0.43	0.433315
ZNF24	zinc finger protein 24	18	18q12	10.46	10.89	-0.43	7.19541e-07
ELK3	ELK3, ETS-domain protein (SRF accessory protein 2)	12	12q23	8.96	9.4	-0.44	0.0110857
MYB	v-myb myeloblastosis viral oncogene homolog (avian)	6	6q22-q23	10.57	11.01	-0.44	0.00586094
SALL2	sal-like 2 (Drosophila)	14	14q11.1-q12	8.98	9.42	-0.44	0.00379467
ZNF212	zinc finger protein 212	7	7q36.1	9.55	9.99	-0.44	0.0141715
MEF2B	myocyte enhancer factor 2B	19	19p12	10.06	10.52	-0.46	0.00700366
PBX3	pre-B-cell leukemia homeobox 3	9	9q33-q34	11.56	12.02	-0.46	4.18104e-07
RFX3	regulatory factor X, 3 (influences HLA class II expression)	9	9p24.2	11.98	12.45	-0.47	1.06694e-05
STAT6	signal transducer and activator of transcription 6, interleukin-4 induced	12	12q13	10.98	11.45	-0.47	0.00450565
NHLH1	nescient helix loop helix 1	1	1q22	9.64	10.12	-0.48	0.0065167
CREB3L1	cAMP responsive element binding protein 3-like 1	11	11p11.2	12.33	12.81	-0.48	1.5115e-05
HOXC6	homeobox C6	12	12q13.3	11.15	11.64	-0.49	0.00555733
SMAD4	SMAD family member 4	18	18q21.1	10.4	10.89	-0.49	1.17271e-06
REST	RE1-silencing transcription factor	4	4q12	10.04	10.54	-0.5	1.19144e-05
CEBPA	CCAAT/enhancer binding protein (C/EBP), alpha	19	19q13.1	9.8	10.31	-0.51	0.0338302
ELF5	E74-like factor 5 (ets domain transcription factor)	11	11p13-p12	10.46	10.97	-0.51	0.0496275
MEOX2	mesenchyme homeobox 2	7	7p22.1-p21.3	9.74	10.25	-0.51	0.00540983
TCF3	transcription factor 3 (E2A immunoglobulin enhancer binding factors E12/E47)	19	19p13.3	10.91	11.42	-0.51	0.00492324
NR2F6	nuclear receptor subfamily 2, group F, member 6	19	19p13.1	11.27	11.8	-0.53	1.54009e-09
MBD1	methyl-CpG binding domain protein 1	18	18q21	11.13	11.67	-0.54	4.87749e-05
TSC22D2	TSC22 domain family, member 2	3	3q25.1	11.24	11.78	-0.54	5.49371e-07
ZBTB16	zinc finger and BTB domain containing 16	11	11q23.1	12.06	12.61	-0.55	1.7529e-07
HOXA5	homeobox A5	7	7p15-p14	9.62	10.18	-0.56	0.0229406
NEUROD1	neurogenic differentiation 1	2	2q32	9.08	9.67	-0.59	0.00128617
SREBF1	sterol regulatory element binding transcription factor 1	17	17p11.2	10.74	11.34	-0.6	0.0205706
RORC	RAR-related orphan receptor C	1	1q21	9.63	10.26	-0.63	0.00341875
MYC	v-myc myelocytomatosis viral oncogene homolog (avian)	8	8q24.21	11.08	11.72	-0.64	9.17754e-06
SALL1	sal-like 1 (Drosophila)	16	16q12.1	10.74	11.49	-0.75	0.512393
MNT	MAX binding protein	17	17p13.3	9.47	10.24	-0.77	7.78703e-07
ESRRA	estrogen-related receptor alpha	11	11q13	10.48	11.48	-1	2.66986e-06
SPDEF	SAM pointed domain containing ets transcription factor	6	6p21.3	11.77	12.95	-1.18	8.25868e-24
ARID3A	AT rich interactive domain 3A (BRIGHT-like)	19	19p13.3	9.25	10.46	-1.21	3.47955e-06
